# Supplementary material for: Amphiphilic Low-Molecular-Weight Gelators Bearing β-S-N-Acetylglucosamine Linked to a Tartaric Acid Scaffold: Synthesis, Self-Assembly and Wheat Germ Agglutinin Binding
Source: MDPI journal article supplement (doi:10.3390/gels10010005), 2023-12-21

## **Amphiphilic Low-Molecular-Weight Gelators Bearing $\beta$ -S-N-Acetylglucosamine Linked to a Tartaric Acid Scaffold: Synthesis, Self-Assembly and Wheat Germ Agglutinin Binding**

Vicente Leafar Peña García<sup>1,2,3</sup>, Pablo Héctor Di Chenna<sup>1,3,\*</sup> and Maria Laura Uhrig<sup>1,2,\*</sup>

<sup>1</sup> Departamento de Química Orgánica, Facultad de Ciencias Exactas y Naturales, Universidad de Buenos Aires, Intendente Güiraldes 2160, 3er piso, Pabellón 2, Ciudad Universitaria, Buenos Aires C1428EGA, Argentina; vicentepena@qo.fcen.uba.ar

<sup>2</sup> Centro de Investigaciones en Hidratos de Carbono (CIHIDECAR), Consejo Nacional de Investigaciones Científicas y Técnicas (CONICET)–Universidad de Buenos Aires, Buenos Aires C1428EGA, Argentina

<sup>3</sup> Unidad de Microanálisis y Métodos Físicos en Química Orgánica (UMYMFOR), Consejo Nacional de Investigaciones Científicas y Técnicas (CONICET)–Universidad de Buenos Aires, Buenos Aires C1428EGA, Argentina

\* Correspondence: dichenna@qo.fcen.uba.ar (P.H.D.C.); mluhrig@qo.fcen.uba.ar (M.L.U.)

**Figure S1.**  $^1\text{H}$  and  $^{13}\text{C}$  NMR spectra (500 and 125 MHz respectively).

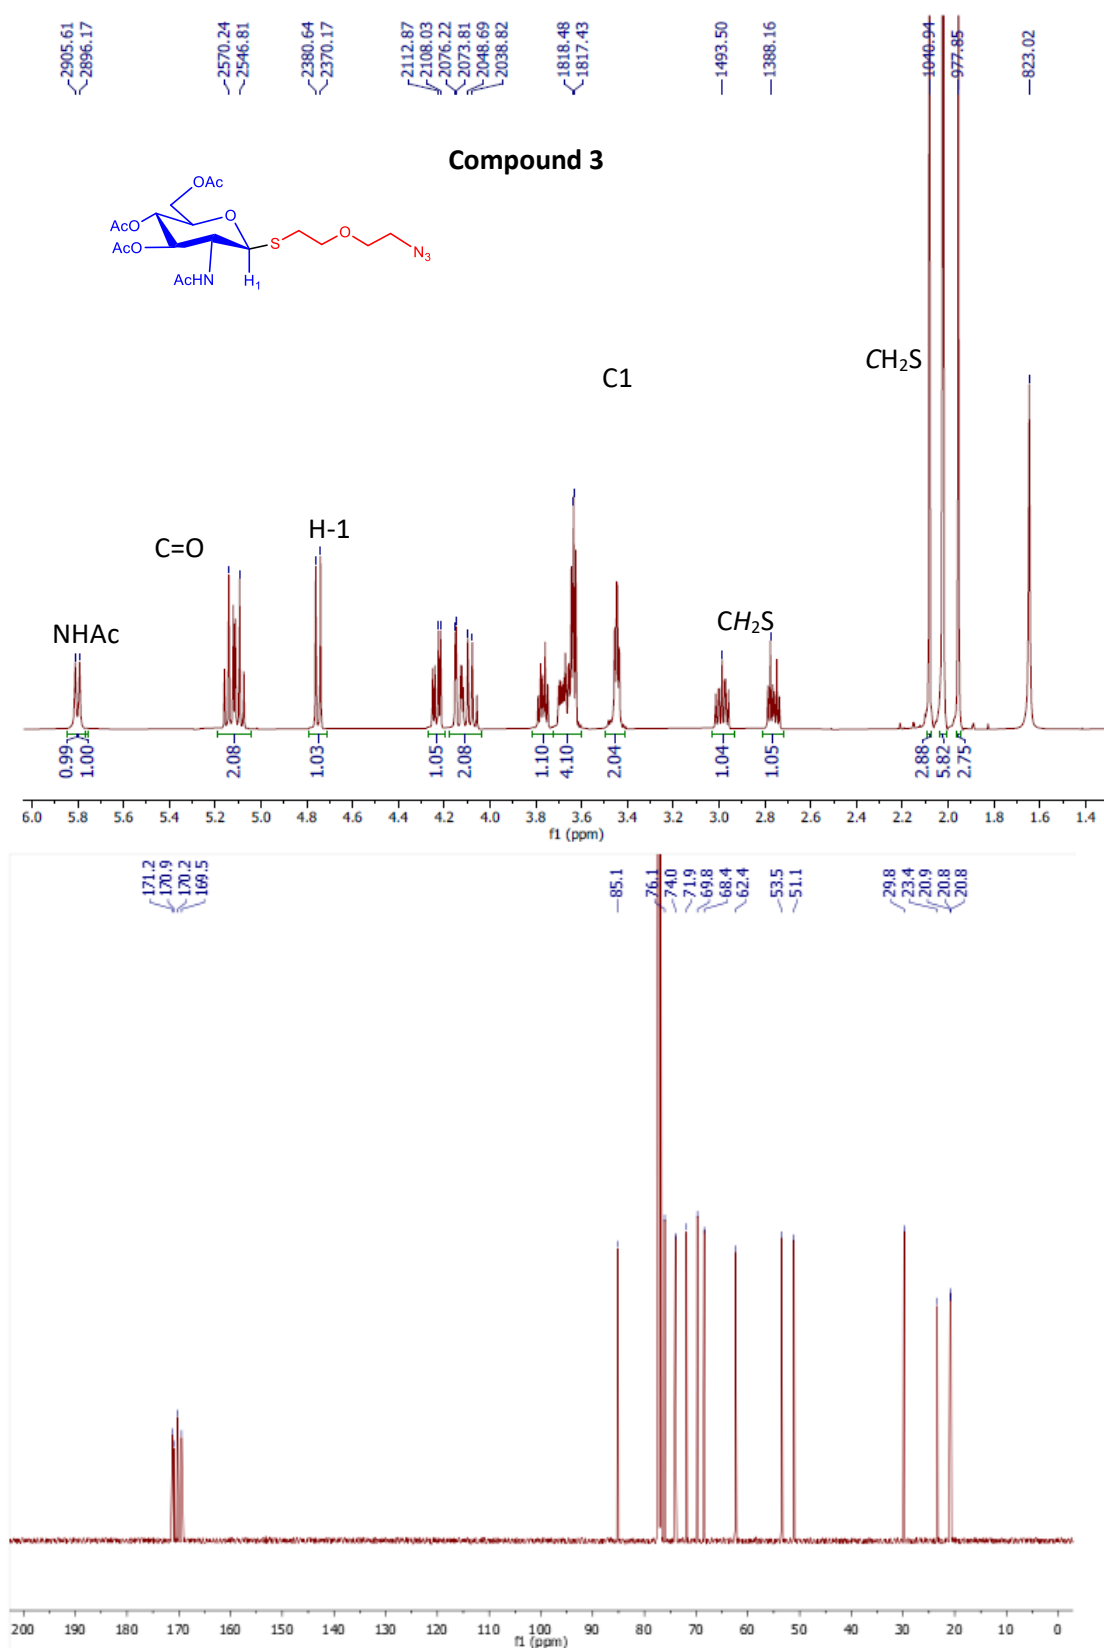

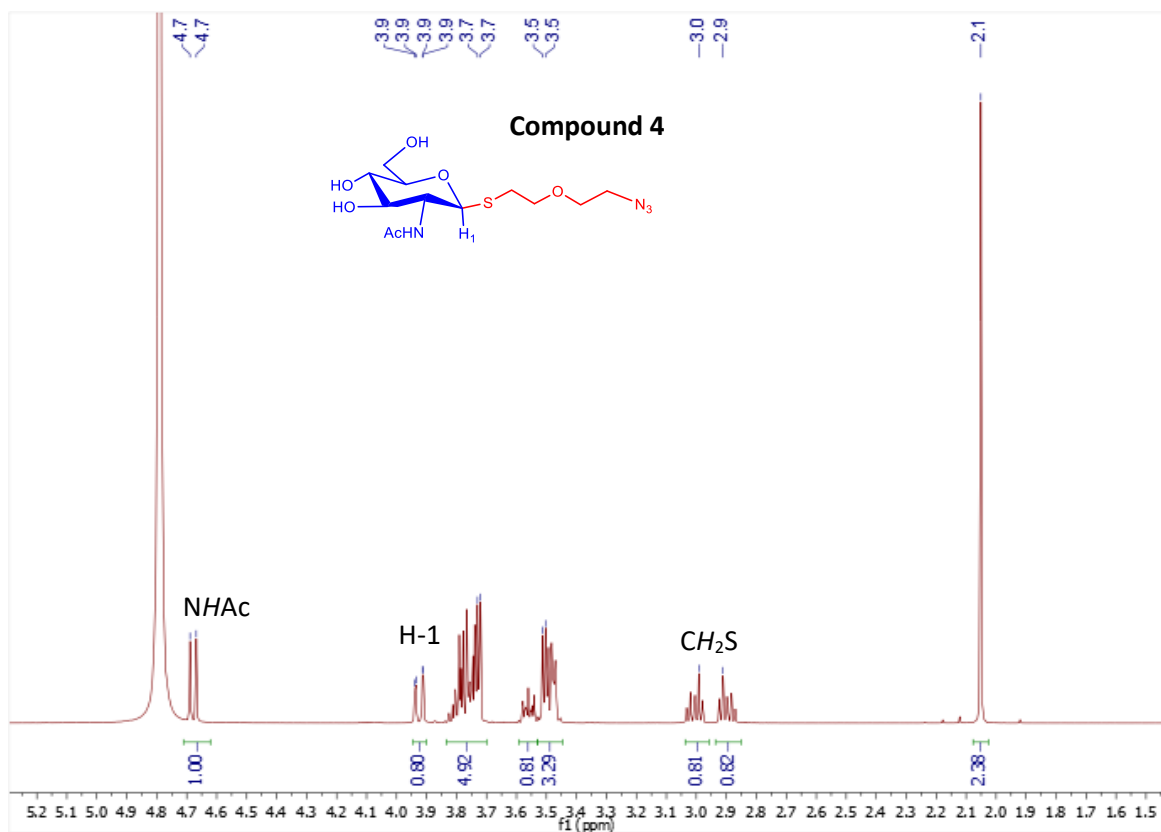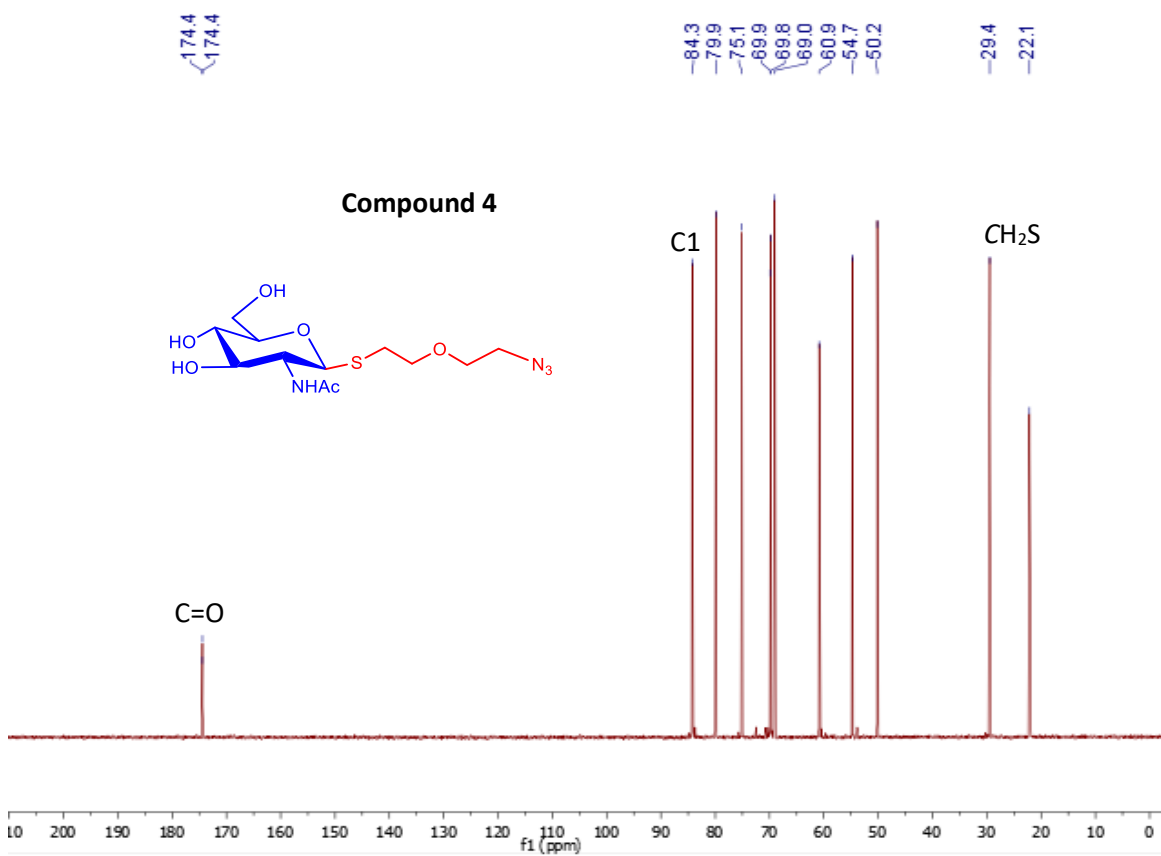

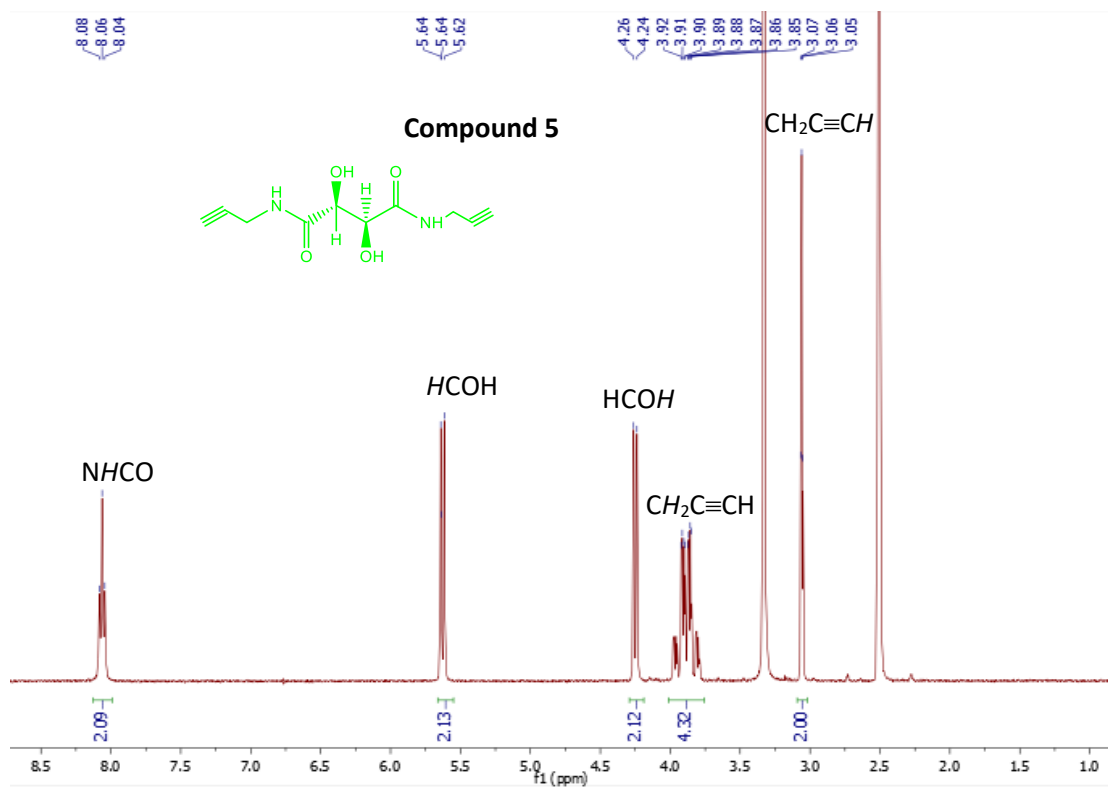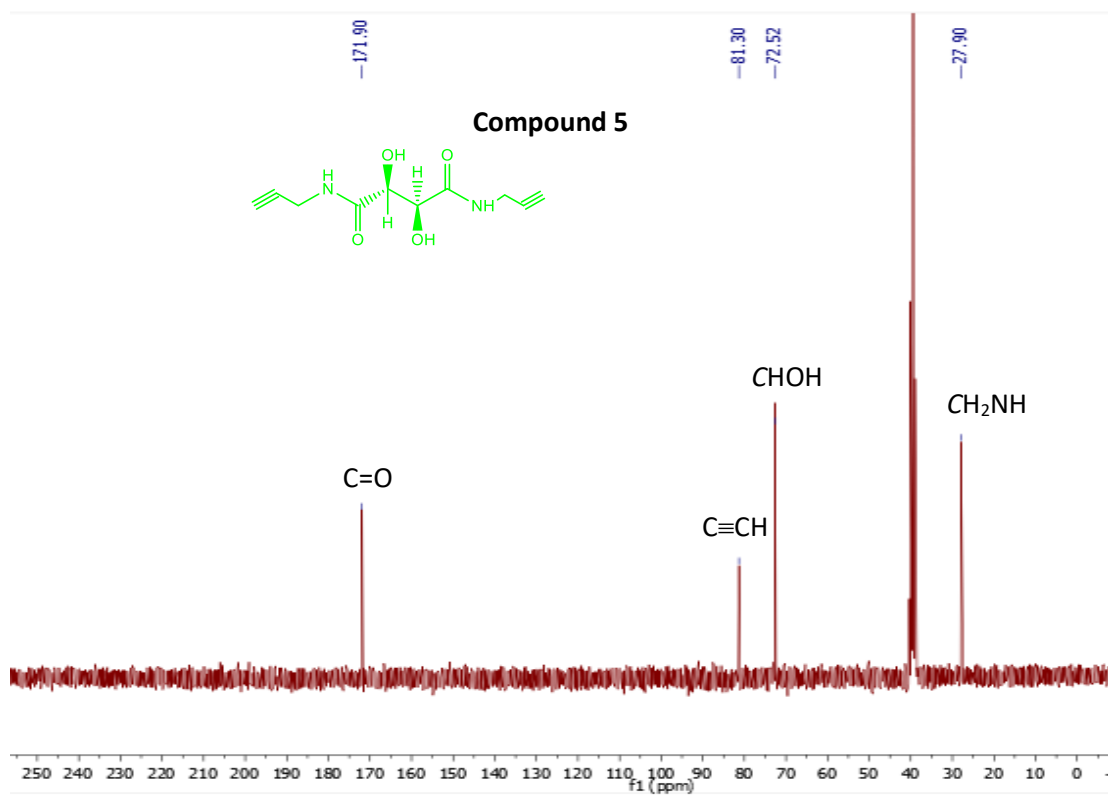

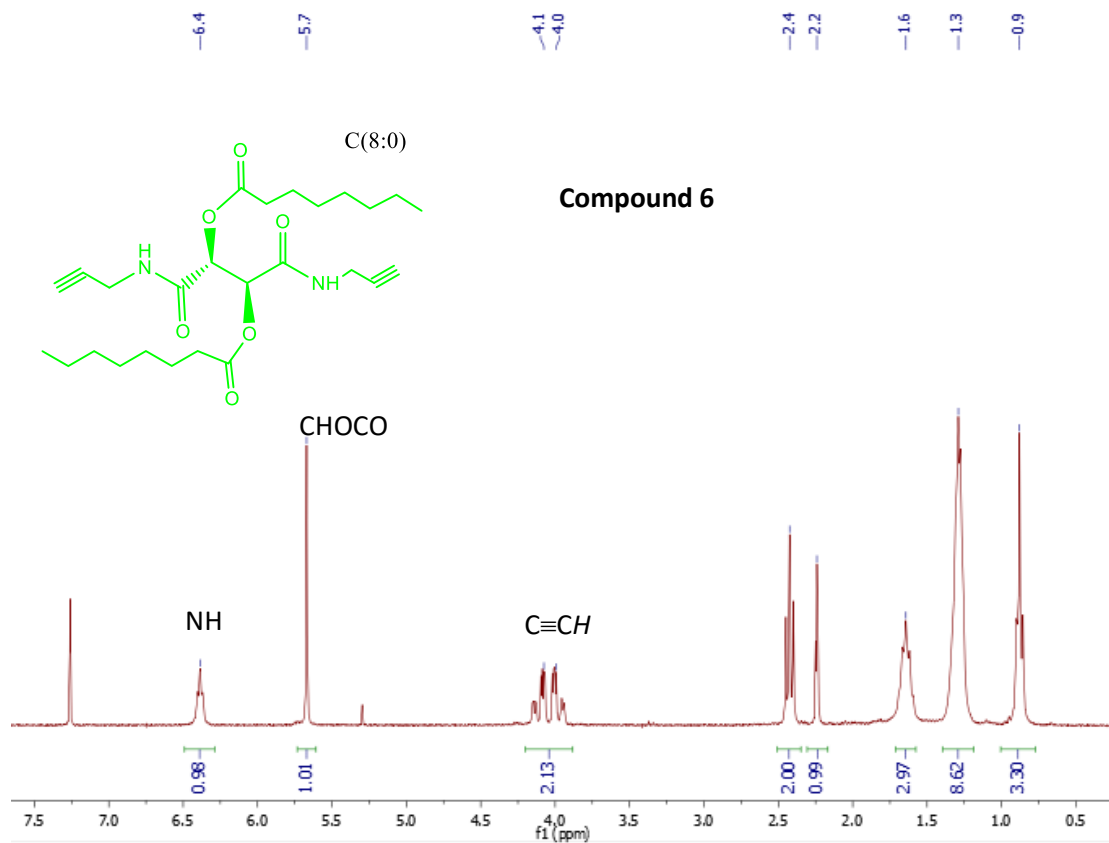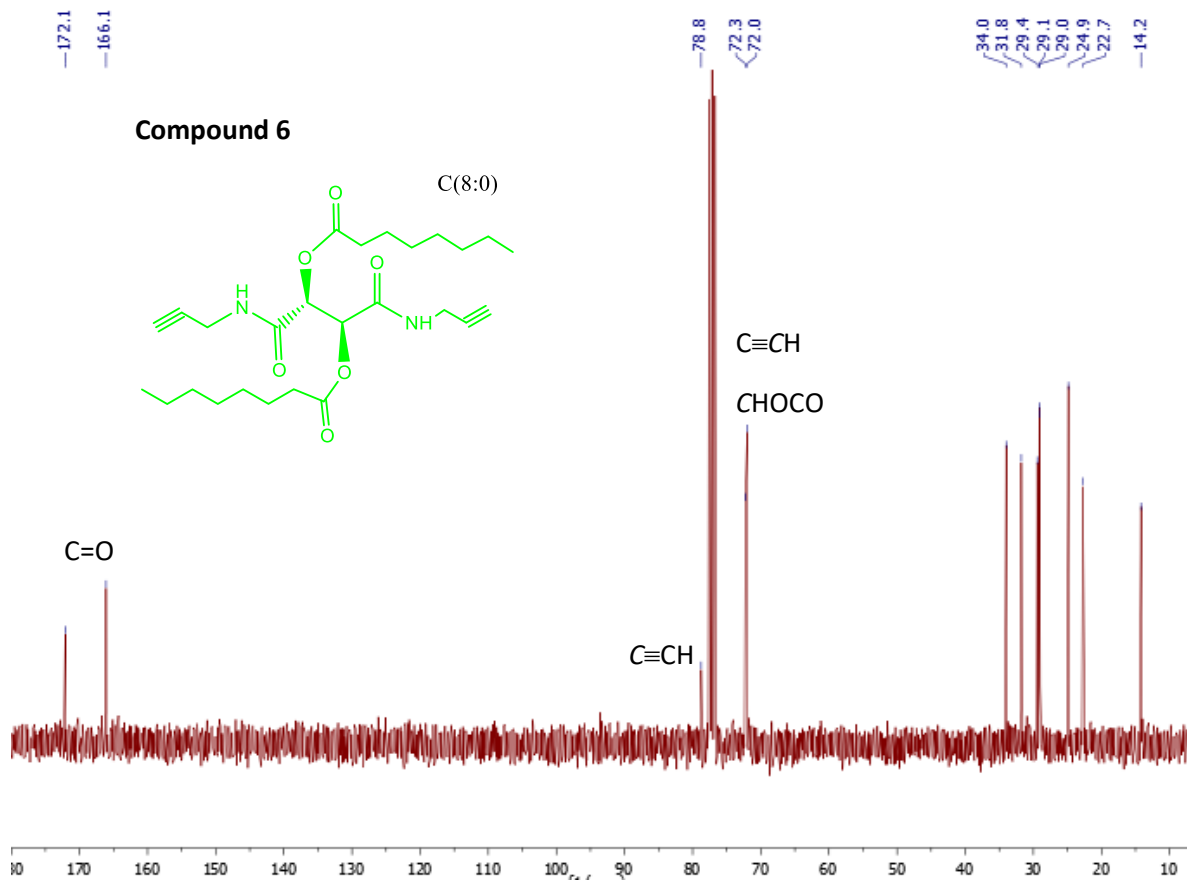

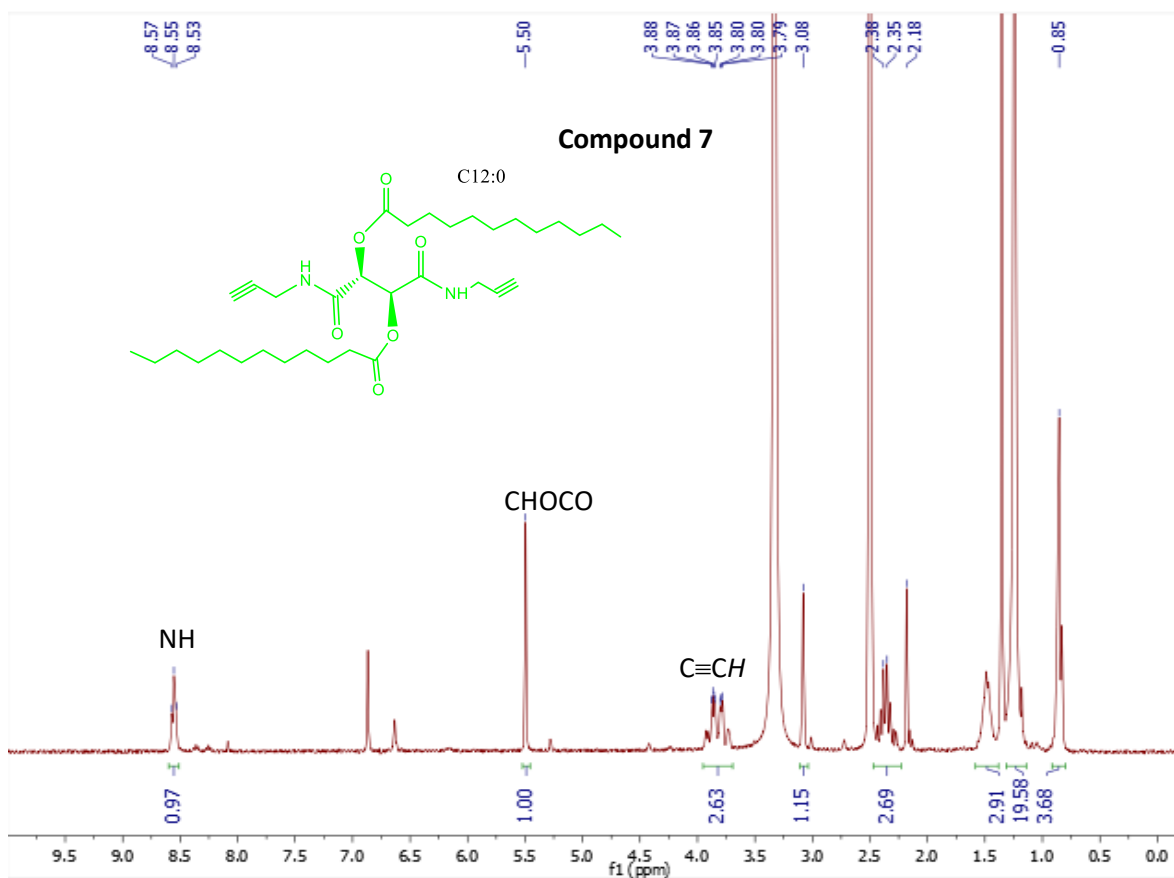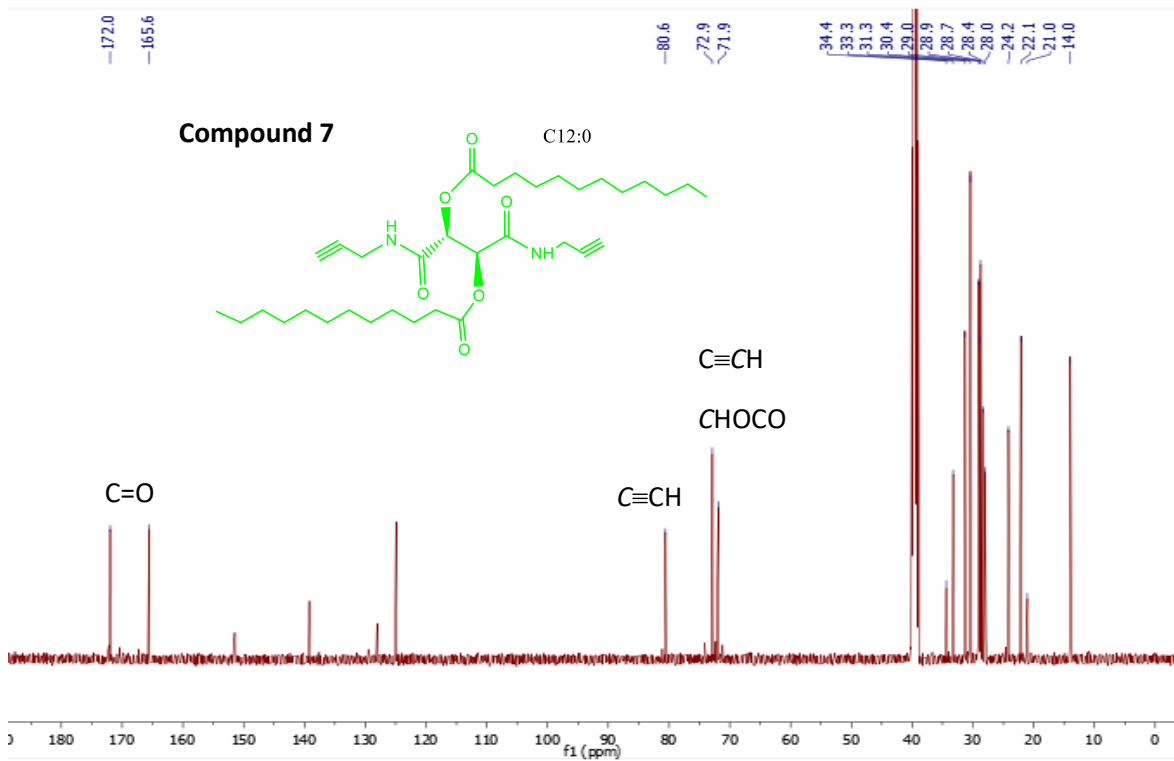

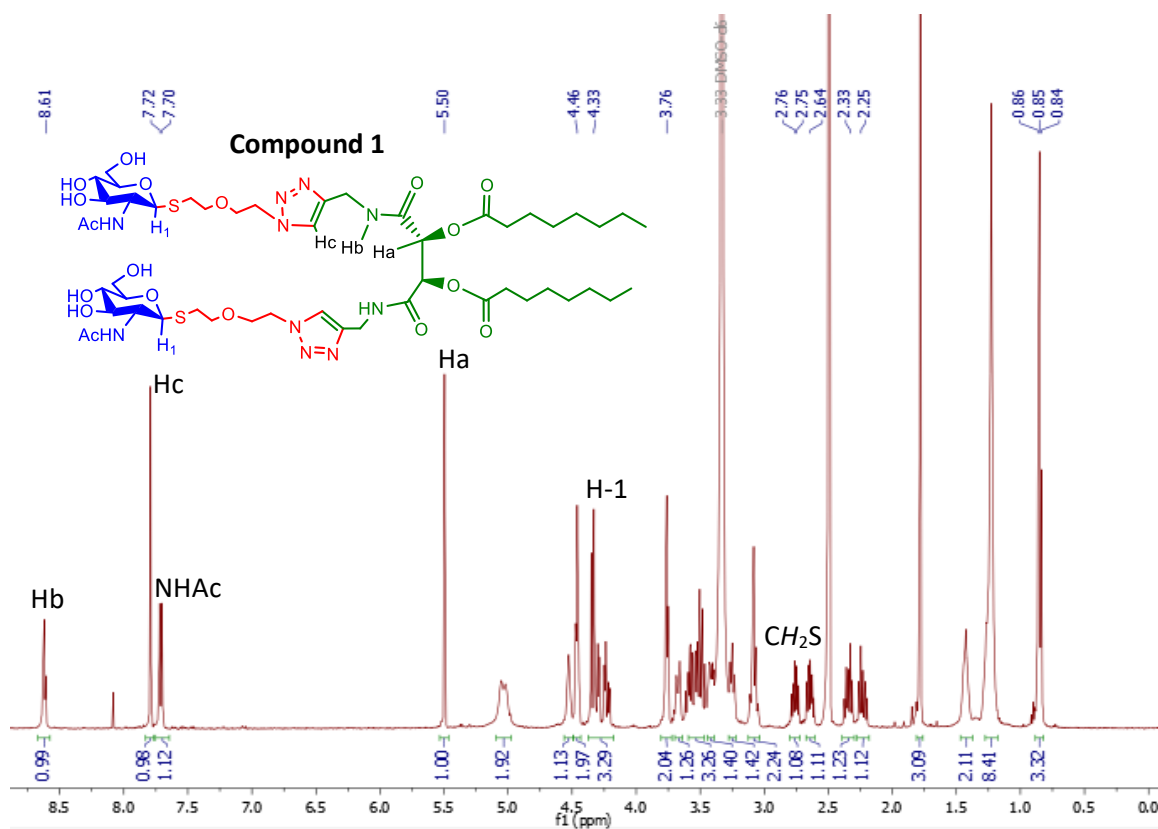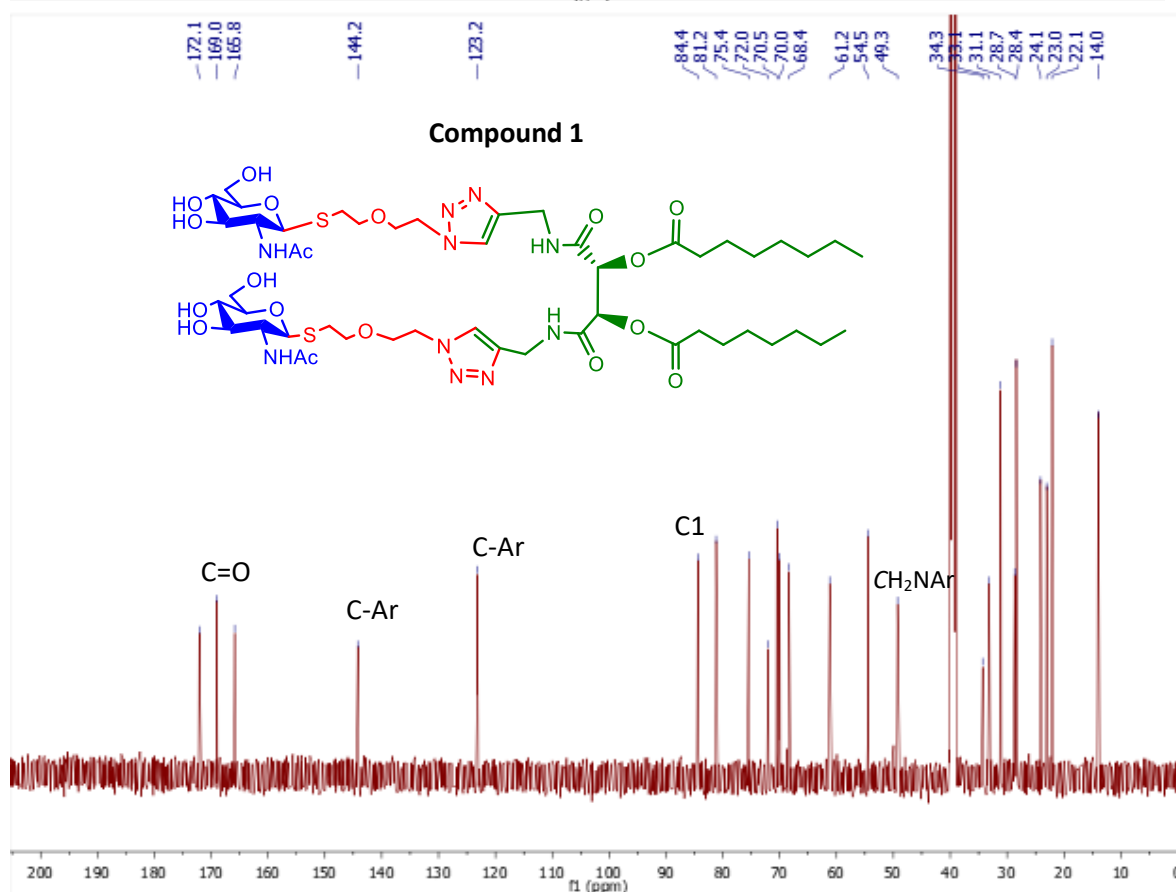

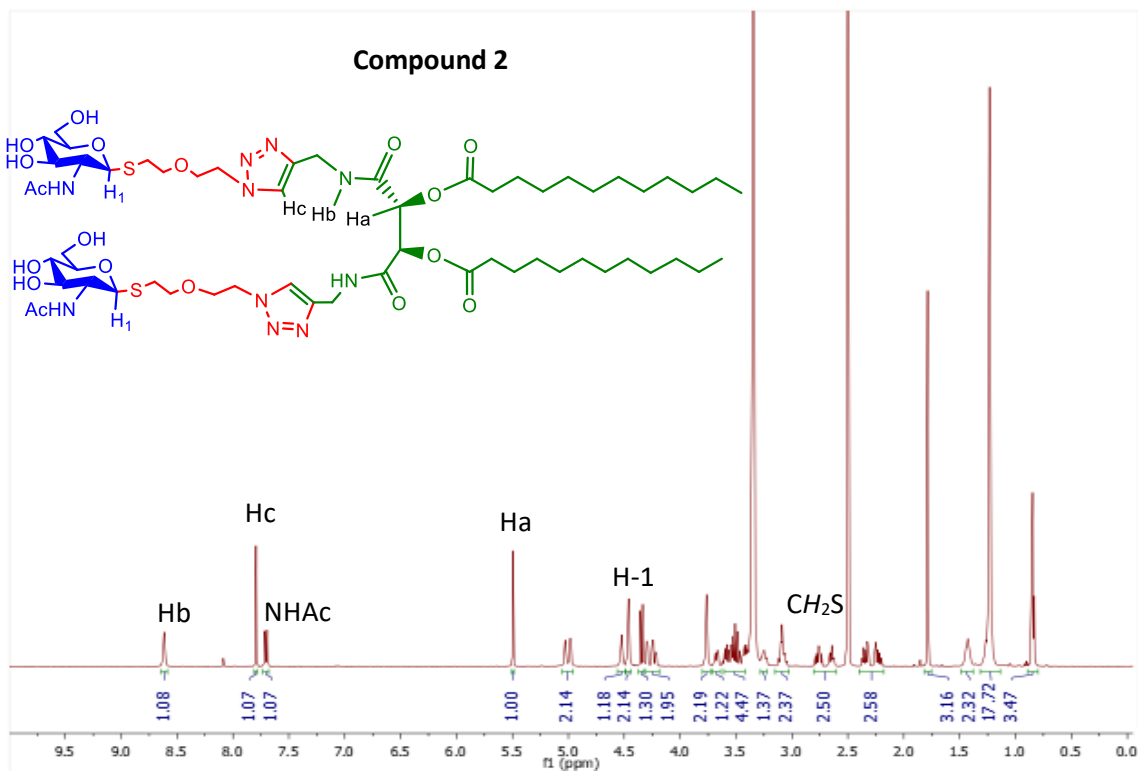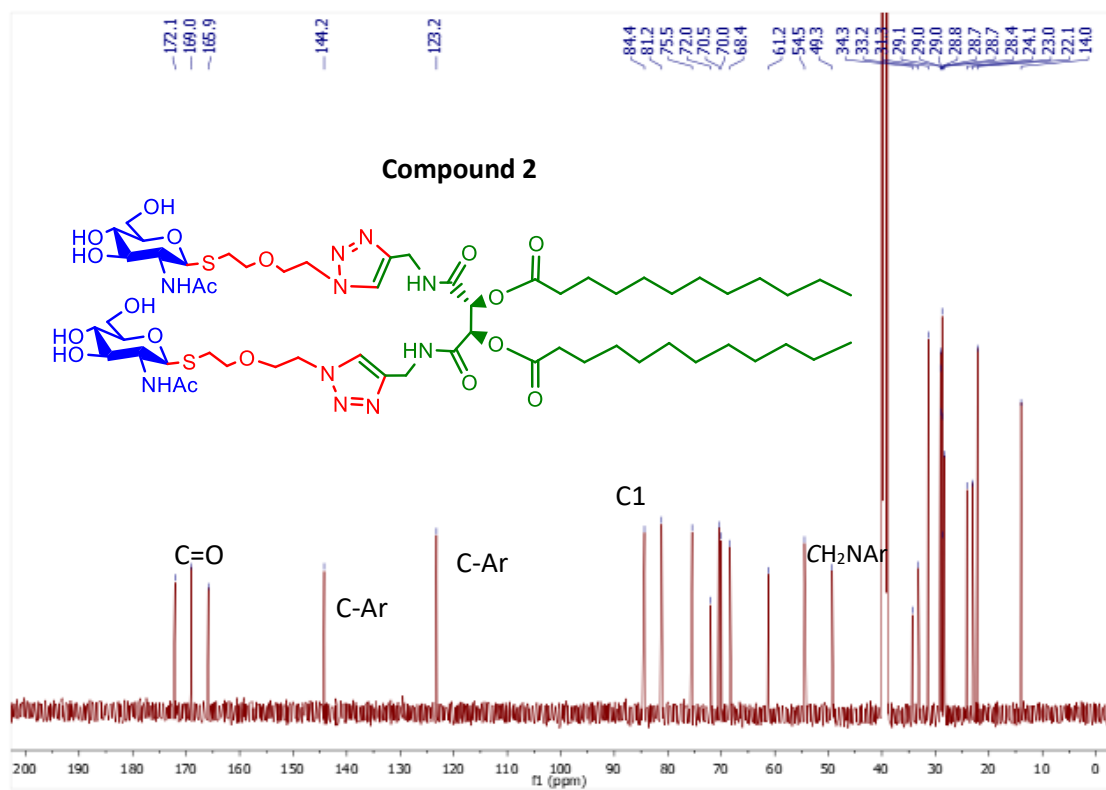



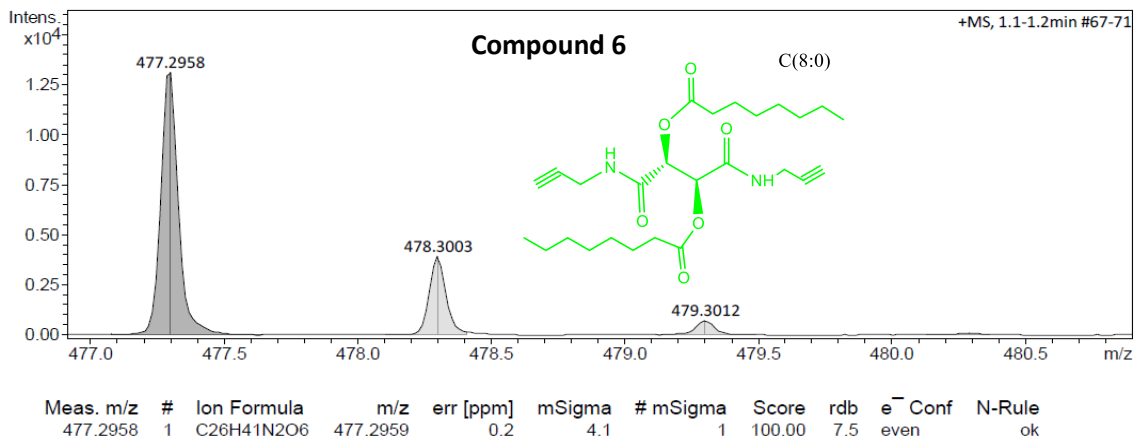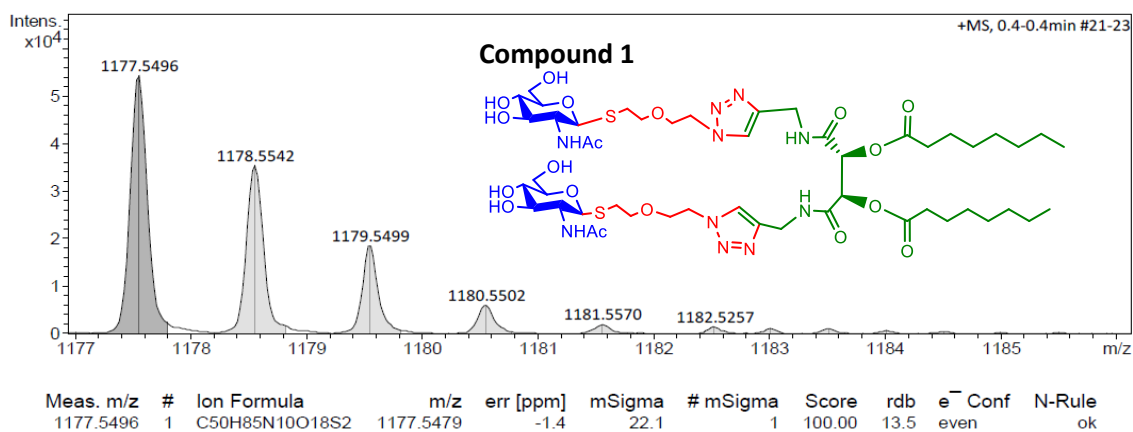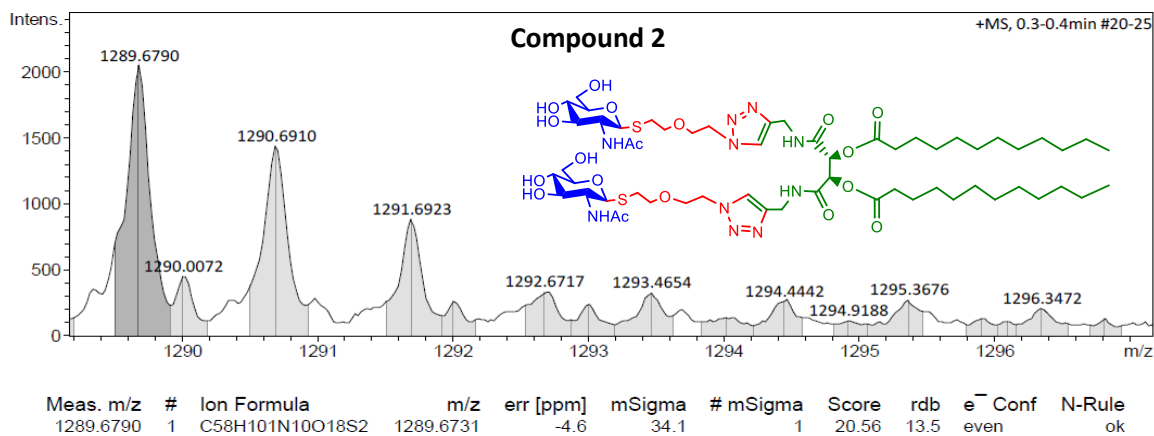

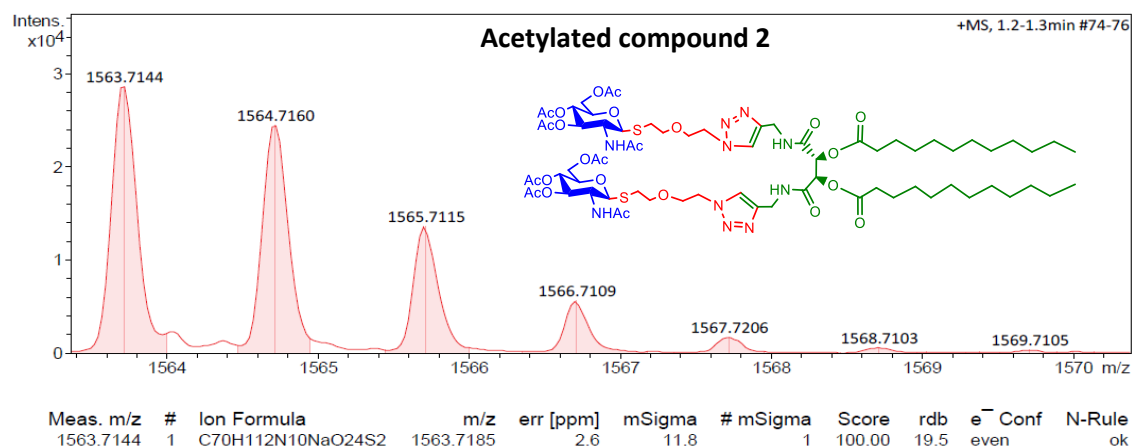

**Figure S2.**  $T_{gel}$  vs concentration plot for hydrogels of **1**

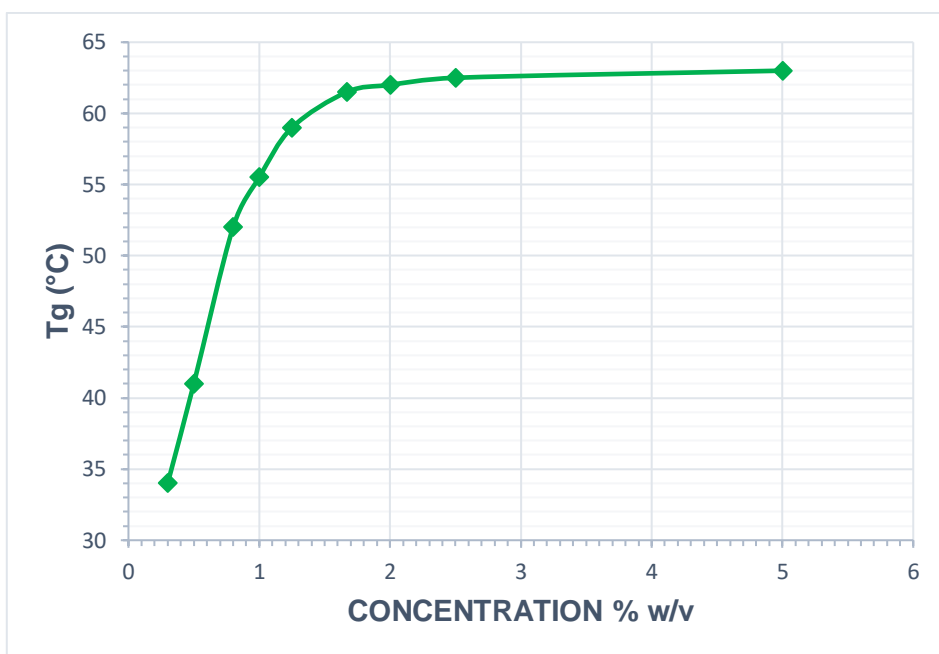

**Figure S3.**  $T_{gel}$  vs concentration plot for DMSO gels of **2**

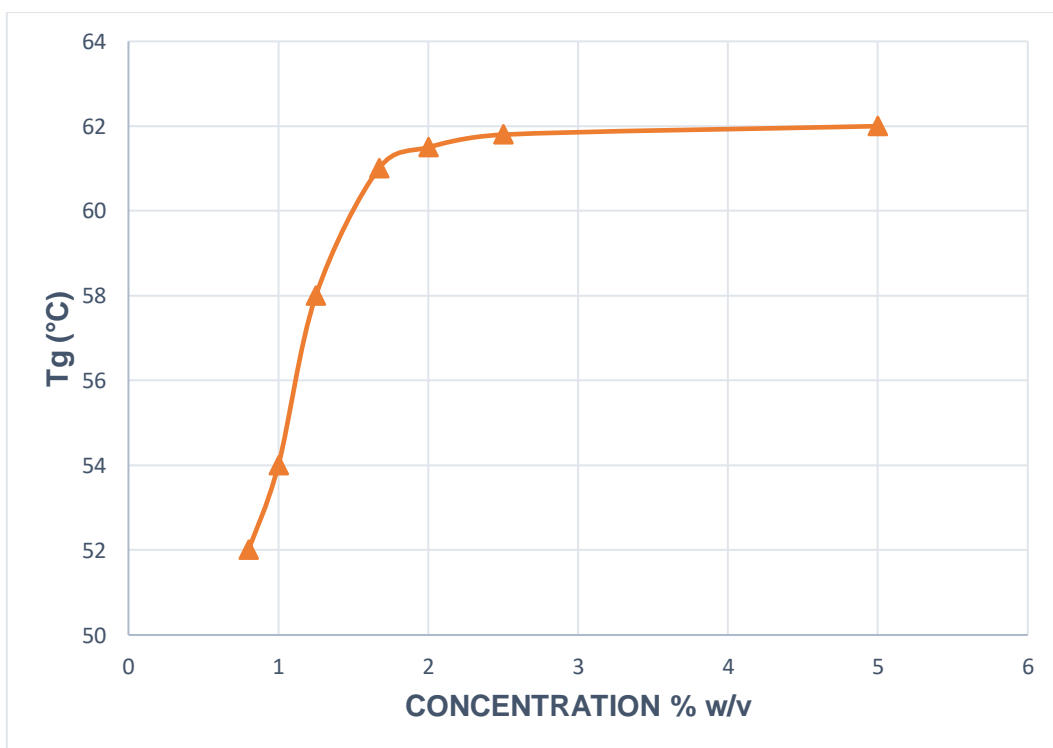

**Figure S4.** Reology. Dynamic strain sweep experiment of a hydrogel of **1** an DMSO gel of **2** at 25°C.

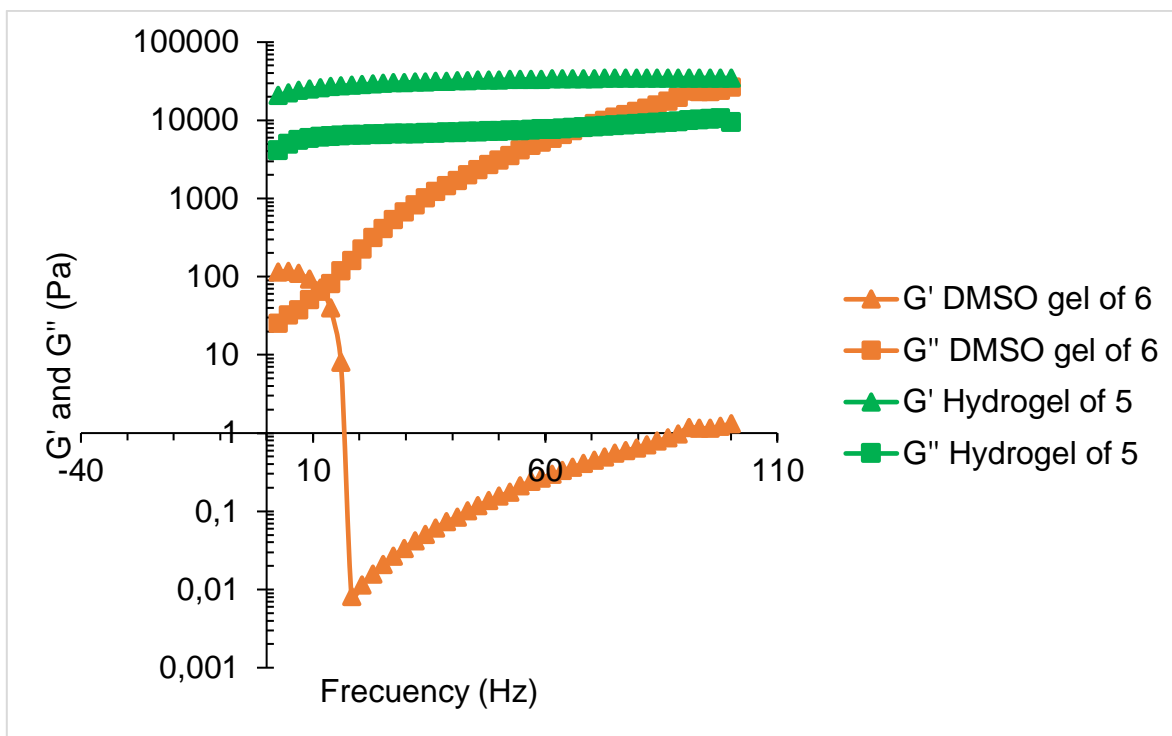

**Figure S5.** Powder XRD experiments

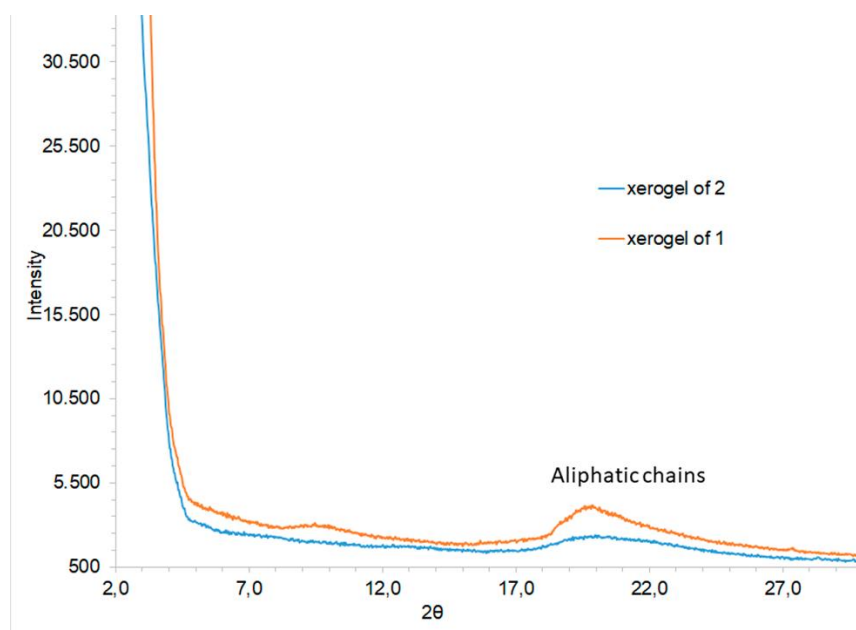

**Figure S6.** SEM images obtained from xerogels of a hydrogel of **1** (a) and a DMSO gel of **2** (b)

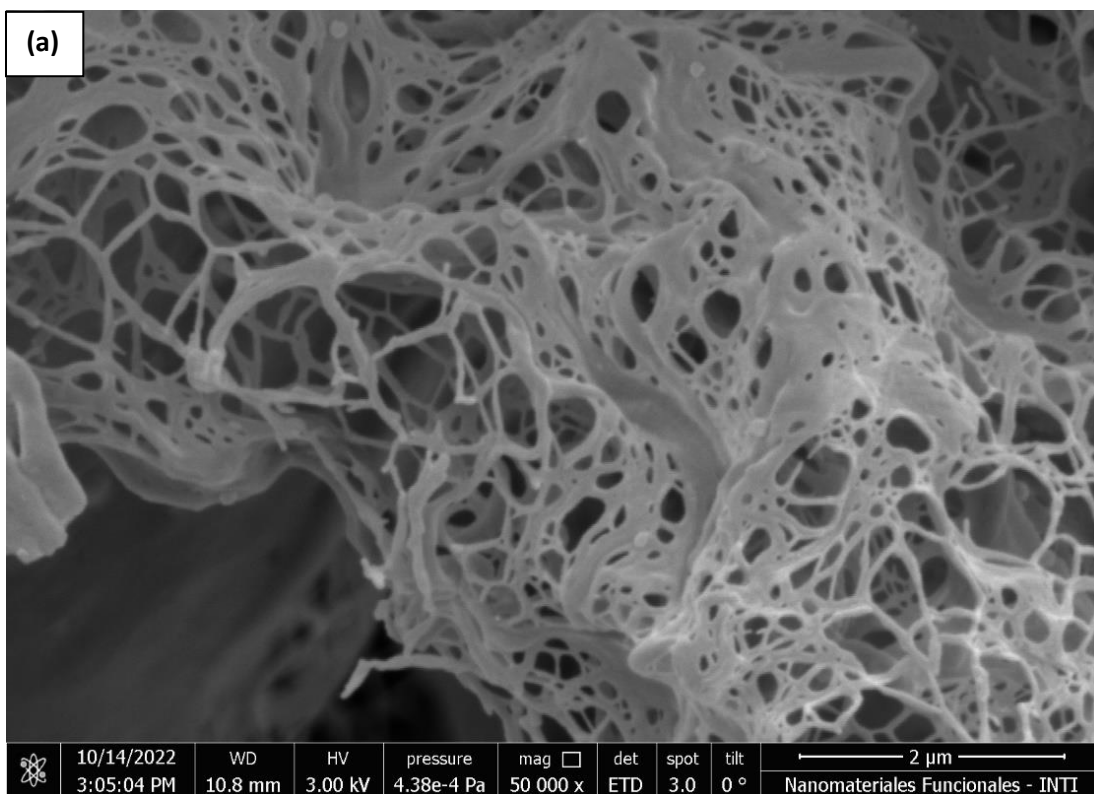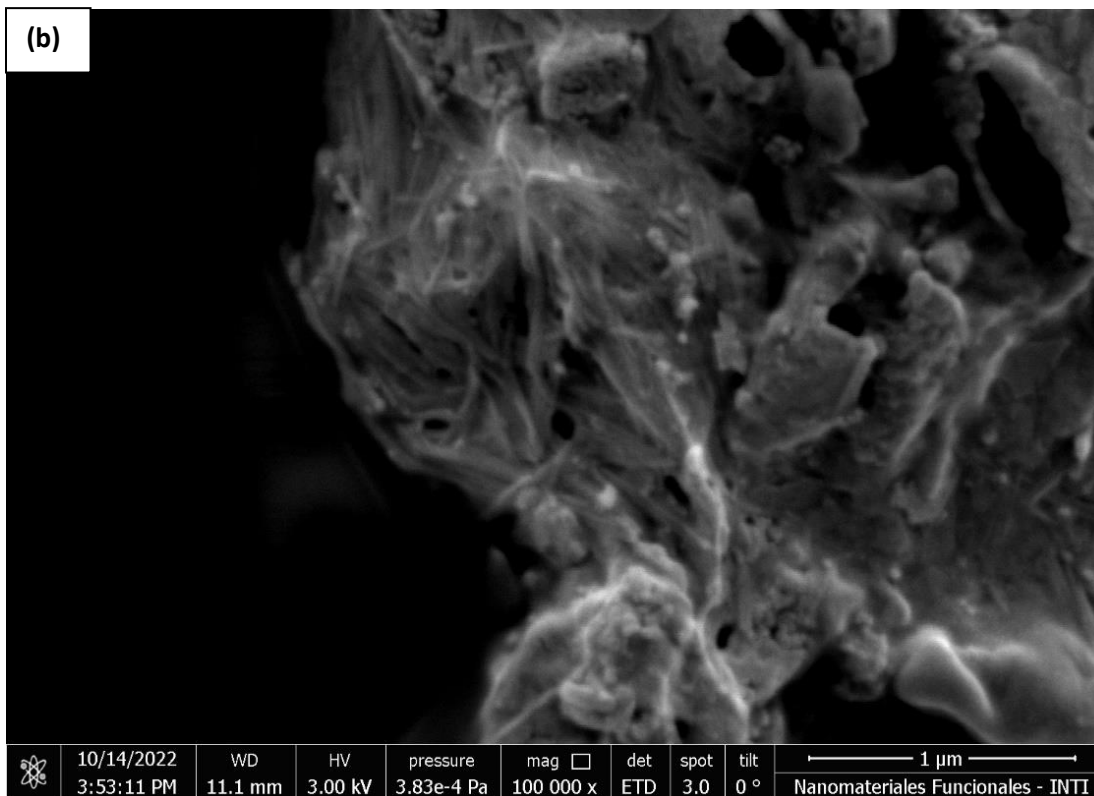

**Figure S7.** TEM image of the xerogel obtained from **2**

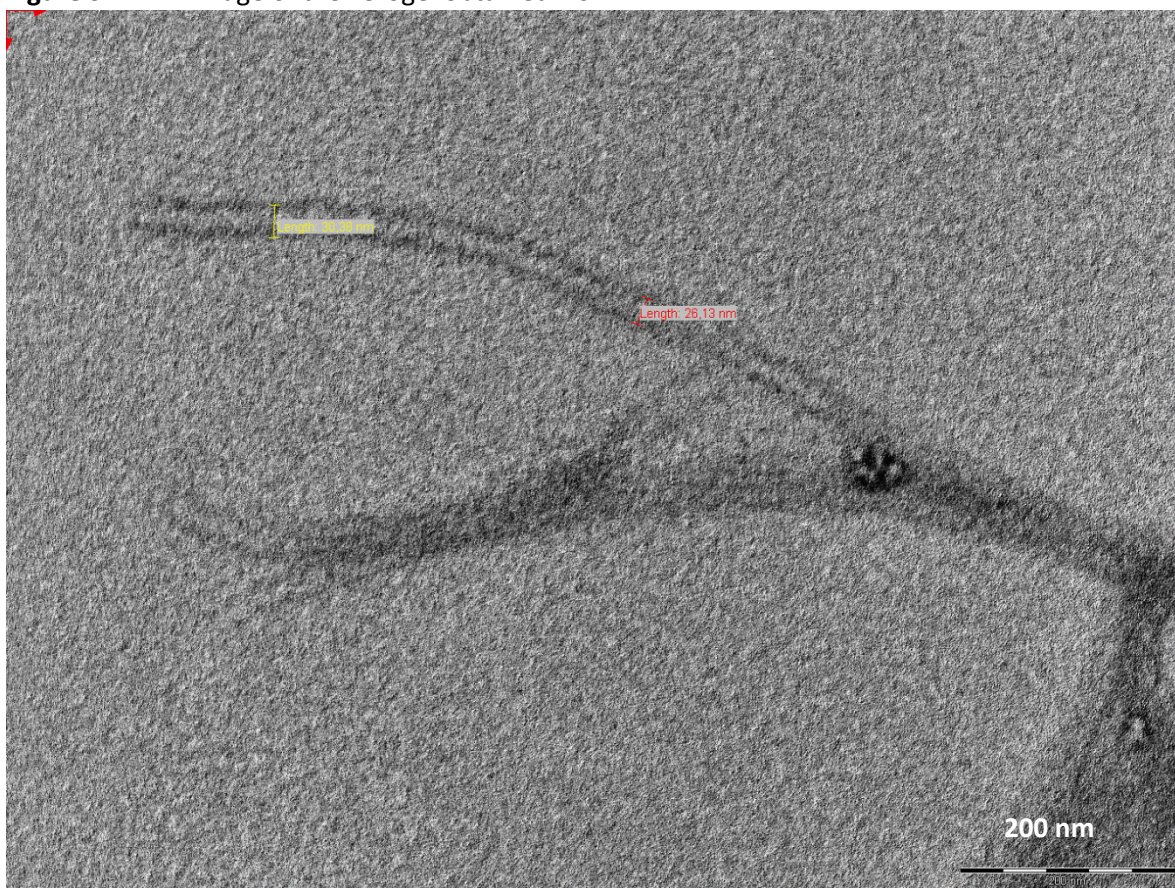

Supplement: s1 [file s1]
